# Supplementary material
Source: PubMed Central journal article supplement (PMC8133697)
Supplement: NEJMc2105282_disclosures.pdf [file NEJMc2105282_disclosures.pdf]

**Disclosure Purpose:** 21-05282

## Summary of Interests

I do not have any interests to disclose at this time.

## Additional Questions:

- Are there other relationships or activities that readers could perceive to have influenced, or that give the appearance of potentially influencing, what you wrote in the submitted work?**  
No.
- What is the manuscript title?**  
Covid-19 Vaccine Acceptance among Residents of California State Prisons
- Are you the corresponding author?**  
No.

## Certification

I certify that the information provided in this disclosure is complete and accurate.

**Disclosure Purpose:** 21-05282

## Summary of Interests

| Company or Organization                                                                                                  |      |                                |
|--------------------------------------------------------------------------------------------------------------------------|------|--------------------------------|
| Entity                                                                                                                   | Type | Interest Held By               |
| <a href="#">Horowitz Family Foundation</a>                                                                               | Gift | Other - Stanford University    |
| <i>Description:</i> Foundation gift to Stanford to support public health research concerning COVID-19 and incarceration. |      | <i>Additional Information:</i> |

## Additional Questions:

- Are there other relationships or activities that readers could perceive to have influenced, or that give the appearance of potentially influencing, what you wrote in the submitted work?**  
No.
- What is the manuscript title?**  
Covid-19 Vaccine Acceptance among Residents of California State Prisons
- Are you the corresponding author?**  
No.

## Certification

I certify that the information provided in this disclosure is complete and accurate.

**Disclosure Purpose:** 21-05282

Summary of Interests

I do not have any interests to disclose at this time.

Additional Questions:

1. **Are there other relationships or activities that readers could perceive to have influenced, or that give the appearance of potentially influencing, what you wrote in the submitted work?**

No.

2. **What is the manuscript title?**

Covid-19 Vaccine Acceptance among Residents of California State Prisons

3. **Are you the corresponding author?**

Yes.

a. **Please list the other authors' names here.**

David Leidner, Theresa Ryckman, Yiran E. Liu, Lea Prince, Fernando Alarid-Escudero, Jason R. Andrews, Joshua A. Salomon, Jeremy D. Goldhaber-Fiebert, David M. Studdert

Certification

I certify that the information provided in this disclosure is complete and accurate.

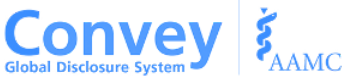

**Disclosure Purpose:** 21-05282

### Summary of Interests

I do not have any interests to disclose at this time.

### Additional Questions:

- Are there other relationships or activities that readers could perceive to have influenced, or that give the appearance of potentially influencing, what you wrote in the submitted work?**  
No.
- What is the manuscript title?**  
Covid-19 Vaccine Acceptance among Residents of California State Prisons
- Are you the corresponding author?**  
No.

### Certification

I certify that the information provided in this disclosure is complete and accurate.

Disclosure Purpose: 21-05282

Summary of Interests

**Company or Organization**

| Entity                                                  | Type       | Interest Held By                                                                                                             |
|---------------------------------------------------------|------------|------------------------------------------------------------------------------------------------------------------------------|
| California Department of Corrections and Rehabilitation | Employment | Self                                                                                                                         |
| <i>Title:</i> Senior Psychologist, Specialist           |            | <i>Position Description:</i> Full-time civil service employee of the California Department of Corrections and Rehabilitation |
| <i>Additional Information:</i>                          |            |                                                                                                                              |

Additional Questions:

- Are there other relationships or activities that readers could perceive to have influenced, or that give the appearance of potentially influencing, what you wrote in the submitted work?**  
No.
- What is the manuscript title?**  
Covid-19 Vaccine Acceptance among Residents of California State Prisons
- Are you the corresponding author?**  
No.

Certification

I certify that the information provided in this disclosure is complete and accurate.

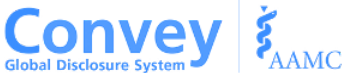

**Disclosure Purpose:** 21-05282

Summary of Interests

I do not have any interests to disclose at this time.

Additional Questions:

- 1. **Are there other relationships or activities that readers could perceive to have influenced, or that give the appearance of potentially influencing, what you wrote in the submitted work?**  
No.
- 2. **What is the manuscript title?**  
Covid-19 Vaccine Acceptance among Residents of California State Prisons
- 3. **Are you the corresponding author?**  
No.

Certification

I certify that the information provided in this disclosure is complete and accurate.

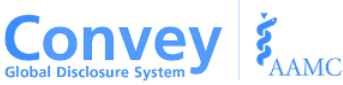

**Disclosure Purpose:** 21-05282

**Summary of Interests**

I do not have any interests to disclose at this time.

**Additional Questions:**

- 1. **Are there other relationships or activities that readers could perceive to have influenced, or that give the appearance of potentially influencing, what you wrote in the submitted work?**  
No.
- 2. **What is the manuscript title?**  
Covid-19 Vaccine Acceptance among Residents of California State Prisons
- 3. **Are you the corresponding author?**  
No.

**Certification**

I certify that the information provided in this disclosure is complete and accurate.



**Disclosure Purpose:** 21-05282

Summary of Interests

I do not have any interests to disclose at this time.

Additional Questions:

- 1. **Are there other relationships or activities that readers could perceive to have influenced, or that give the appearance of potentially influencing, what you wrote in the submitted work?**  
No.
- 2. **What is the manuscript title?**  
Covid-19 Vaccine Acceptance among Residents of California State Prisons
- 3. **Are you the corresponding author?**  
No.

Certification

I certify that the information provided in this disclosure is complete and accurate.





Disclosure Purpose: 21-05282

Summary of Interests

**Company or Organization**

| Entity                                                                                                                                | Type             | Interest Held By                                                                |
|---------------------------------------------------------------------------------------------------------------------------------------|------------------|---------------------------------------------------------------------------------|
| <b>Centers for Disease Control and Prevention</b>                                                                                     | Grant / Contract | Self                                                                            |
| <i>Recipient Name:</i> Stanford University<br><i>Grant / Contract Description:</i> NU38OT000297<br><i>Additional Information:</i>     |                  | <i>Recipient Type:</i> Institution<br><i>Grant / Contract Purpose:</i> Research |
| <b>National Institutes of Health</b>                                                                                                  | Grant / Contract | Self                                                                            |
| <i>Recipient Name:</i> Stanford University<br><i>Grant / Contract Description:</i> 3R37DA01561217S1<br><i>Additional Information:</i> |                  | <i>Recipient Type:</i> Institution<br><i>Grant / Contract Purpose:</i> Research |

Additional Questions:

- Are there other relationships or activities that readers could perceive to have influenced, or that give the appearance of potentially influencing, what you wrote in the submitted work?**  
No.
- What is the manuscript title?**  
Covid-19 Vaccine Acceptance among Residents of California State Prisons
- Are you the corresponding author?**  
No.

Certification

I certify that the information provided in this disclosure is complete and accurate.



**Disclosure Purpose:** 21-05282

**Summary of Interests**

I do not have any interests to disclose at this time.

**Additional Questions:**

- 1. **Are there other relationships or activities that readers could perceive to have influenced, or that give the appearance of potentially influencing, what you wrote in the submitted work?**  
No.
- 2. **What is the manuscript title?**  
Covid-19 vaccine acceptance among residents of California state prisons
- 3. **Are you the corresponding author?**  
No.

**Certification**

I certify that the information provided in this disclosure is complete and accurate.
